# Supplementary material for: Genome-wide identification and analysis of the thiolase family in insects
Source: PeerJ journal article supplement (doi:10.7717/peerj.10393), 2020-11-20

(A) Catabolic process of 3-oxoacyl-CoA thiolase

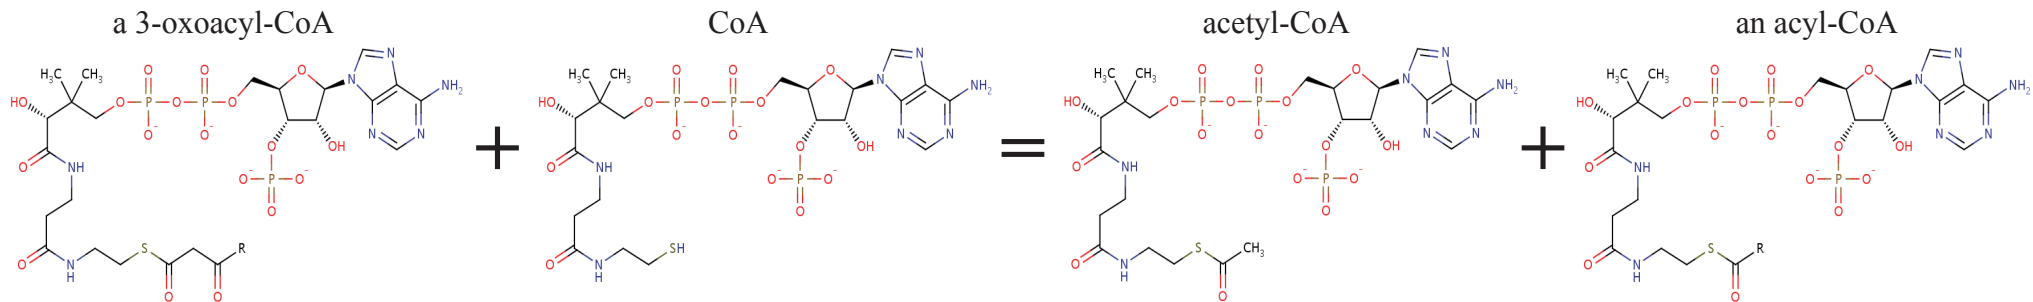

(B) Biosynthetic process of acetoacetyl-CoA thiolase

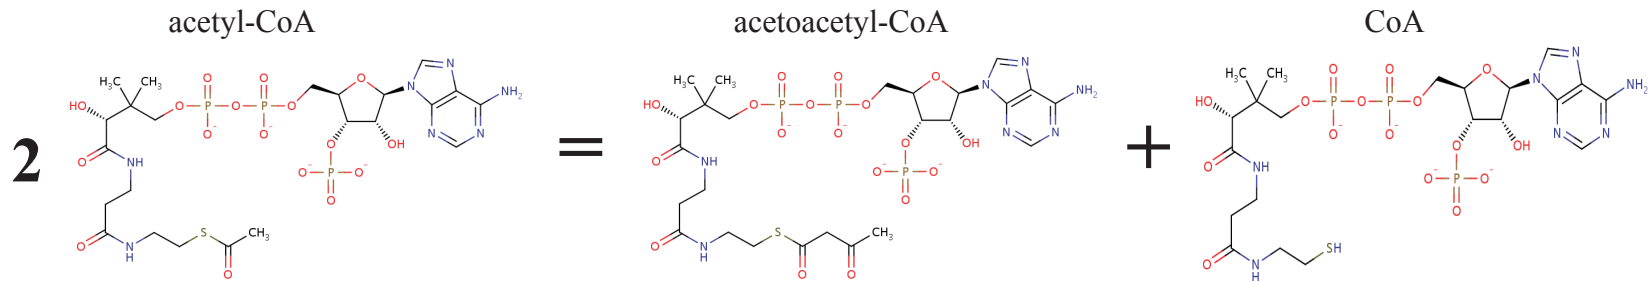

Supplement: Figure_S1.pdf [file Figure_S1.pdf]
