# Supplementary material for: Genome-wide identification and analysis of the thiolase family in insects
Source: PeerJ journal article supplement (doi:10.7717/peerj.10393), 2020-11-20

(A) Gene structure analysis

■ Exon (ex.)    ≡ Intron (in.)

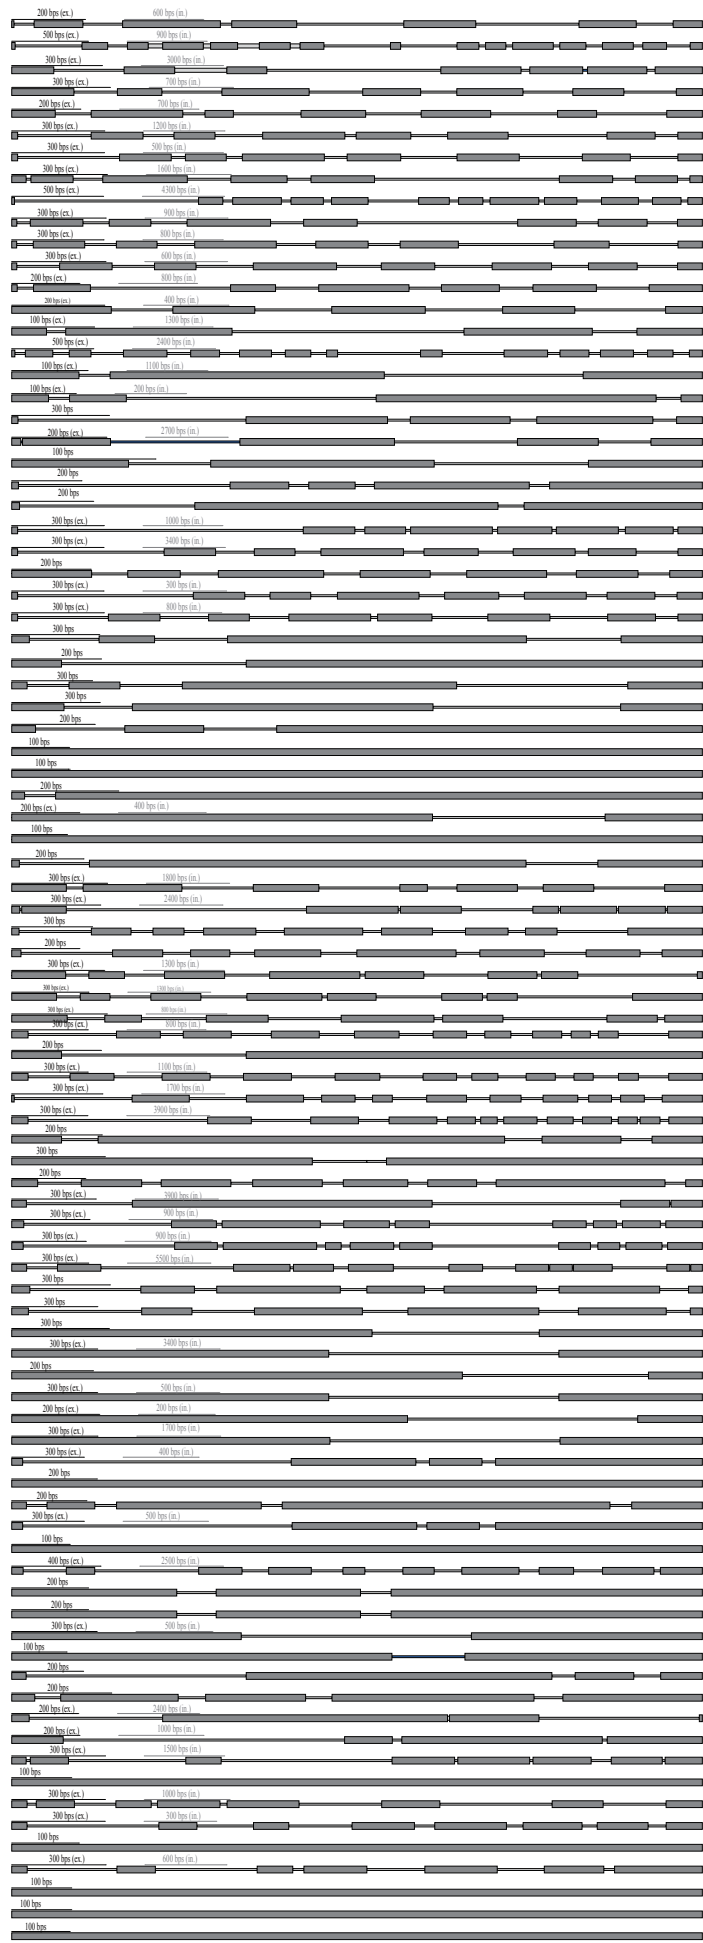

(B) Subcellular localization

Mit Cyt Pox

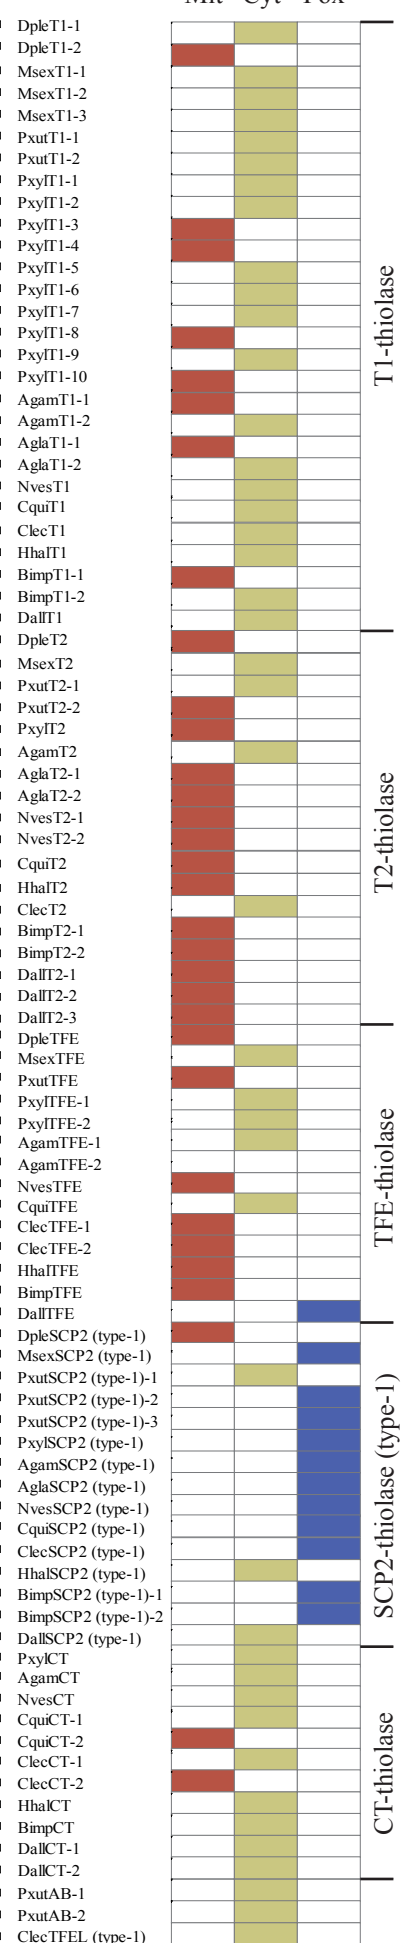

Supplement: Figure_S2.pdf [file Figure_S2.pdf]
