# Supplementary material for: Genome-wide identification and analysis of the thiolase family in insects
Source: PeerJ journal article supplement (doi:10.7717/peerj.10393), 2020-11-20

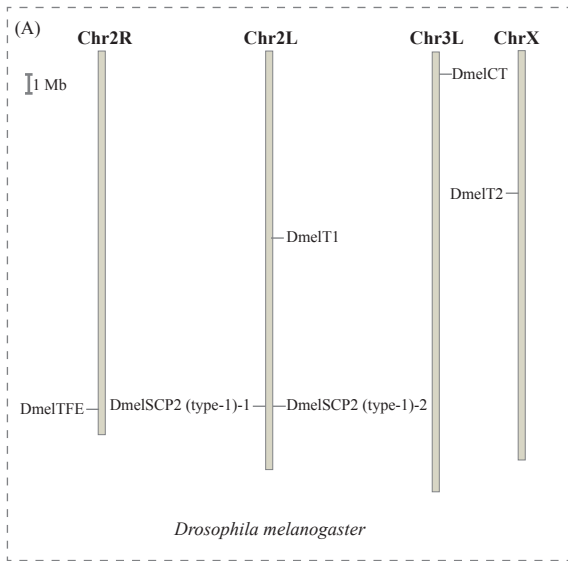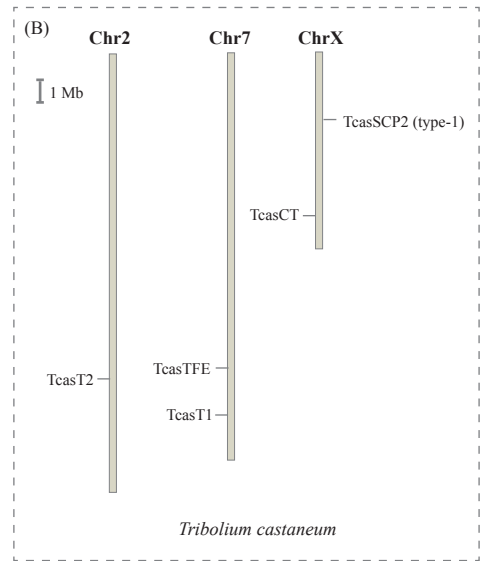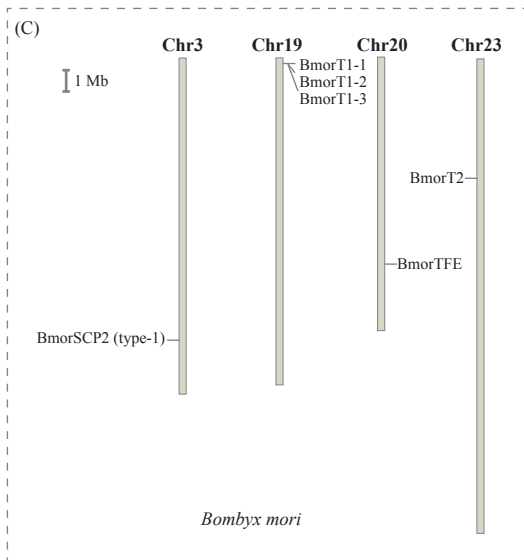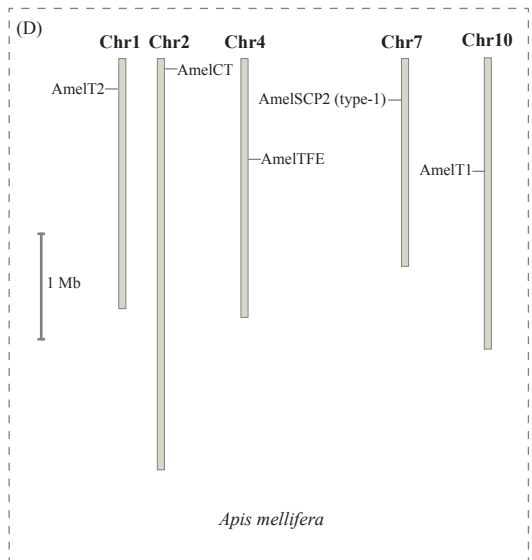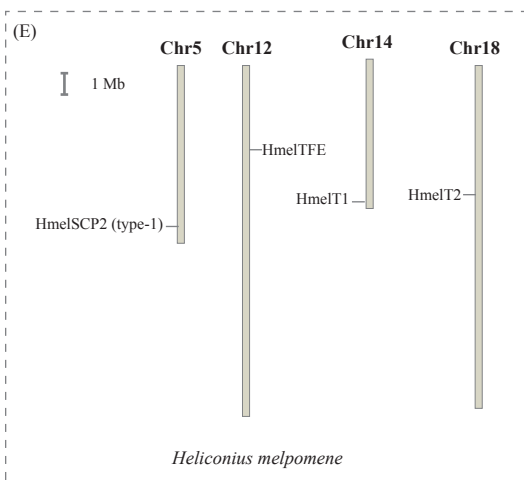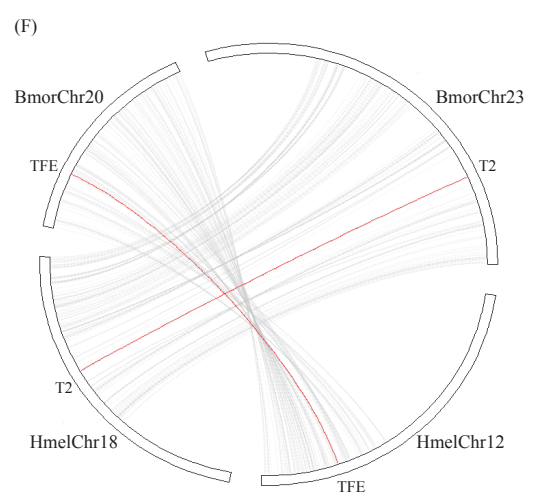

Supplement: Figure_S3.pdf [file Figure_S3.pdf]
