# Supplementary material for: Genome-wide identification and analysis of the thiolase family in insects
Source: PeerJ journal article supplement (doi:10.7717/peerj.10393), 2020-11-20
Supplement: Figure_S4_new2.pdf [file Figure_S4_new2.pdf]

|                         |     |                   |     |                   |     |                       |     |              |
|-------------------------|-----|-------------------|-----|-------------------|-----|-----------------------|-----|--------------|
| Lep_BmorSCP2 (type-1)   | 73  | IPIYVNNNCGSTG     | 287 | QVDVVELHDCFAA     | 334 | NPSGGLIAKGHP          | 377 | LQLGGGMG     |
| Hym_AmelSCP2 (type-1)   | 77  | CPIYVNNNCGSTG     | 290 | DVDVIELHDCFSI     | 337 | NPSGGLISKGHP          | 380 | LQI GGG LG   |
| Dip_DmeISCP2 (type-1)-1 | 76  | IPVYVNNNCGSTG     | 290 | DVQVVELHDCFSA     | 337 | NPSGGLISKGHP          | 380 | LQLGGGLG     |
| Dip_DmeISCP2 (type-1)-2 | 76  | IPVYVNNNCGSTG     | 290 | DVQVVELHDCFSA     | 337 | NPSGGLISKGHP          | 380 | LQLGGGLG     |
| Dip_AgamSCP2 (type-1)   | 76  | IPIYVNNNCGSTG     | 289 | DVDVVELHDCFSA     | 336 | NPSGGLISKGHP          | 379 | LQI GGG LG   |
| Col_AglaSCP2 (type-1)   | 73  | IPIFVNNNCGSTG     | 286 | DVQVVELHDCFSA     | 333 | NPSGGLISKGHP          | 376 | LQI GGG LG   |
| Col_NvesSCP2 (type-1)   | 73  | IPIINVNNNCGSTG    | 286 | DVQVVELHDCFSA     | 333 | NPSGGLISKGHP          | 376 | LQI GGG LG   |
| Col_TcasSCP2 (type-1)   | 189 | IPIFVNNNCGSTG     | 402 | DVQVVELHDCFSA     | 449 | NPSGGLISKGHP          | 492 | LQI GGG LG   |
| Dip_CquiSCP2 (type-1)   | 76  | IPVYVNNNCGSTG     | 289 | DVDVVELHDCFSA     | 336 | NPSGGLISKGHP          | 379 | LQI GGG LG   |
| Hem_ApisSCP2 (type-1)-1 | 76  | IPIYVNNNCGSTG     | 289 | DVNVVELHDCFSA     | 336 | NPSGGLISKGHP          | 379 | LQI GGG LG   |
| Hem_ApisSCP2 (type-1)-2 | 7   | - - - - -         | 102 | DVNVVELHDCFSA     | 149 | NPSGGLISKGHP          | 171 | - - - - -    |
| Hem_ClecSCP2 (type-1)   | 76  | IPIYVNNNCGSTG     | 289 | DVDVVELHDCFSA     | 336 | NPSGGLISKGHP          | 379 | LQI GGG LG   |
| Hem_HhalSCP2 (type-1)   | 77  | IPIYVNNNCGSTG     | 290 | DI DVVELHDCFSA    | 337 | NPSGGLISKGHP          | 380 | LQI GGG LG   |
| Hym_BimpSCP2 (type-1)-2 | 77  | CPIYVNNNCGATG     | 290 | DVDVIELHDCFST     | 337 | NPSGGLISKGHP          | 380 | LQI GGG LG   |
| Hym_BimpSCP2 (type-1)-1 | 77  | CPIYVNNNCGATG     | 290 | DVDVIELHDCFST     | 337 | NPSGGLISKGHP          | 380 | LQI GGG LG   |
| Hym_DallSCP2 (type-1)   | 77  | CPVYVNNNCGATG     | 290 | DVDVVELHDCFSA     | 337 | NPSGGLISKGHP          | 380 | LQI GGG LG   |
| Lep_DpleSCP2 (type-1)   | 73  | IPIYVNNNCGSTG     | 287 | QVDVVELHDCFAT     | 334 | NPSGGLIAKGHP          | 377 | LQLGGGMG     |
| Lep_HmelSCP2 (type-1)   | 73  | IPIYVNNNCGSTG     | 287 | QVDVVELHDCFAA     | 334 | NPSGGLIAKGHP          | 377 | LQLGGGMG     |
| Lep_MsexSCP2 (type-1)   | 73  | IPIYVNNNCGSTG     | 287 | QVDVVELHDCFAA     | 334 | NPSGGLIAKGHP          | 377 | LQLGGGMG     |
| Lep_PxutSCP2 (type-1)-1 | 73  | LPVHNI NNHGATG    | 286 | EVDVVELHDCFSS     | 333 | NPSGGLI AKGNP         | 376 | LQLGGG - A   |
| Lep_PxutSCP2 (type-1)-2 | 73  | IPIYVNNNCGSTG     | 287 | QIDVVELHDCFAA     | 334 | NPSGGLIAKGHP          | 377 | LQLGGGMG     |
| Lep_PxutSCP2 (type-1)-3 | 5   | - PIYVNNNCGSTG    | 218 | EVDVVELHDCFAS     | 265 | NPSGGLIAKGHP          | 308 | LQLGGGMG     |
| Lep_PxylSCP2 (type-1)   | 73  | IPIYVNNNCGSTG     | 287 | QIDVVELHDCFAA     | 334 | NPSGGLIAKGHP          | 377 | LQLGGGMG     |
| Pht_PhumSCP2 (type-1)   | 76  | IPIFVNNNCGSTG     | 288 | DVHVVELHDCFST     | 335 | NPSGGLISKGHP          | 378 | LQI GGG LG   |
| Hsap_SCP2 (type-1)      | 85  | IPIINVNNNCGATG    | 298 | DI DVIELHDCFST    | 345 | NPSGGLISKGHP          | 388 | LQI GGG LG   |
| MtubSCP2 (type-1)       | 92  | IPIVNVNNNCGSTG    | 303 | DFGVIELHDCFSA     | 350 | NPSGGLISKGHP          | 393 | LQI GGG - A  |
| MtubSCP2 (type-2)       | 84  | TPATRHEAACASG     | 300 | DL DGI EVHDCFPS   | 347 | NPSGGLI - - GHP       | 386 | A - EAGG - G |
| Lep_BmorT1-1            | 85  | KPVLGINRLCGSG     | 313 | DVDLIEINEAFVA     | 342 | NVNGGATALGHP          | 381 | ACI GGGQG    |
| Lep_BmorT1-2            | 87  | KPALGVNRLCGSG     | 317 | DI DLVEINEAFVA    | 346 | NVNGGAIAMGHP          | 385 | ACI GGGQG    |
| Lep_BmorT1-3            | 85  | RPALGVSKACGTG     | 315 | DVDLFEINEAFAS     | 344 | NVNGGALAFGNP          | 383 | SC - GGGQG   |
| Hym_AmeIT1              | 85  | KPSFSLNRLCGSG     | 315 | DI ELIEINEAFGS    | 344 | NVDGGSIALGHP          | 384 | ACI GGGQG    |
| Dip_DmeIT1              | 85  | KPALGINRLCGSG     | 315 | DI DLIEINEAFAA    | 344 | NVNGGAIALGHP          | 383 | ACI GGGQG    |
| Dip_AgamT1-2            | 85  | RPALGVNRLCGSG     | 315 | DI DLFEINEAFGV    | 344 | NLNGGAIALGHP          | 383 | ACI GGGQG    |
| Dip_AgamT1-1            | 127 | RPALGVNRLCGSG     | 190 | D - ALWTLTDSY - - | 204 | - - - - - - - - P     | 205 | - - - - -    |
| Col_AglaT1-1            | 73  | YILILI - - FITNG  | 242 | - - - - -         | 246 | - - - - - - - - G - - | 263 | LR - - - - - |
| Col_AglaT1-2            | 4   | - - - - -         | 22  | DI DLIEINEAFGA    | 51  | NVDGGAIALGHP          | 90  | ACI GGGQG    |
| Col_NvesT1              | 85  | KPALQVNRRLCGSG    | 315 | DM DLIEINEAFGA    | 344 | NVNGGAIALGHP          | 383 | ACI GGGQG    |
| Col_TcasT1              | 85  | RP AFLVNRLCGSG    | 315 | DI DLIEINEAFAA    | 344 | NVDGGAIALGHP          | 383 | ACI GGGQG    |
| Dip_CquiT1              | 85  | KPALGVNRLCGSG     | 315 | DI DLVEINEAFGV    | 344 | NLNGGAIALGHP          | 383 | ACI GGGQG    |
| Hem_ApisT1              | 84  | RHALGVNRLCGSG     | 314 | DI DLVEINEAFGA    | 343 | NVNGGAIALGHP          | 382 | ACI GGGQG    |
| Hem_ClecT1              | 85  | RPALGINRLCGSG     | 315 | DI DLVEINEAFGA    | 344 | NVNGGAIALGHP          | 383 | ACI GGGQG    |
| Hem_HhalT1              | 85  | KPALGVNRLCGSG     | 316 | DI DLIEINEAFGA    | 345 | NP DGGAIALGHP         | 384 | ACI GGGQG    |
| Hym_BimpT1-1            | 90  | KPAFSVNRLCGSG     | 320 | DVELVEINEAFGA     | 349 | NVDGGAIALGHP          | 389 | ACI GGGQG    |
| Hym_BimpT1-2            | 85  | KPAFSVNRLCGSG     | 315 | DVELVEINEAFGA     | 344 | NVDGGAIALGHP          | 384 | ACI GGGQG    |
| Hym_DallT1              | 85  | KPALGVNRLCGSG     | 315 | DI DLVEINEAFGA    | 344 | NVNGGAIALGHP          | 383 | ACI GGGQG    |
| Iso_ZnevT1              | 85  | RP AVAVNRLCGSG    | 315 | DI DLVEINEAFGA    | 344 | NVNGGAIALGHP          | 383 | ACI GGGQG    |
| Lep_DpleT1-1            | 25  | RPALAVNRLCGSG     | 253 | DI DLVEINEAFVA    | 282 | NVNGGATALGHP          | 321 | ACI GGGQG    |
| Lep_DpleT1-2            | 87  | KPALGVNRLCGSG     | 317 | DI DLVEINEAFAA    | 346 | NVNGGAIALGHP          | 385 | ACI GGGLG    |
| Lep_HmelT1              | 407 | KPALGVNRLCGSG     | 637 | DI DLVEINEAFAA    | 713 | SSWGGSLSLGTP          | 972 | LAIAGGTG     |
| Lep_MsexT1-3            | 21  | KPVVSTNLLSGSA     | 282 | DI DLVEI HETNAA   | 311 | NLSGGAIALGHP          | 336 | ICVAGGQG     |
| Lep_MsexT1-1            | 125 | KPVLGINRLCGSG     | 353 | DI DLIEINEAFVA    | 382 | NVNGGATALGHP          | 411 | - - - - -    |
| Lep_MsexT1-2            | 87  | KPALGINRLCGSG     | 317 | DI DLVEINEAFAA    | 346 | NVNGGAIAMGHP          | 385 | ACI GGGQG    |
| Lep_PxutT1-1            | 85  | RPVLGINRLCGSG     | 313 | DI DLVEINEAFVA    | 342 | NVNGGATALGHP          | 381 | ACI GGGQG    |
| Lep_PxutT1-2            | 85  | RPALGVSKACGAG     | 314 | DVEIFEINETTAI     | 343 | NVSGGALALGHP          | 383 | SC - GGGQG   |
| Lep_PxylT1-1            | 38  | KPVLGVNRLCGSG     | 266 | DVDLIEVR - VY - - | 288 | - - - GGQLSV - HP     | 329 | VC DGGGLG    |
| Lep_PxylT1-2            | 341 | TPALGVNRLCGSG     | 571 | DVDLVEINEAFAA     | 600 | NVSGGAIAMGHP          | 639 | ACI GGGQG    |
| Lep_PxylT1-3            | 84  | RPALVNMACGAG      | 307 | DVDLIEINETFAA     | 336 | NVNGGALAVGHP          | 375 | SC - GGGQG   |
| Lep_PxylT1-4            | 84  | RPALAVNLACGAG     | 308 | GVDLIEINETFAA     | 337 | NVNGGALAVGHP          | 384 | SC - GGGQG   |
| Lep_PxylT1-5            | 84  | RPALGVNLACGAG     | 308 | GVDLIEINETFAA     | 337 | NVNGGALAVGHP          | 376 | SC - GGGQG   |
| Lep_PxylT1-6            | 84  | RPALAVNLACGAG     | 307 | SVDLIEINETFAA     | 336 | NVNGGALAVGHP          | 365 | - - - - -    |
| Lep_PxylT1-7            | 17  | - - - - -         | 192 | DVDLVEINEAFAA     | 221 | NVNGGAIAMGHP          | 260 | ACI GGGQG    |
| Lep_PxylT1-8            | 9   | - - - - - CV - -  | 76  | DVDLVEINEAFAA     | 105 | NVNGGAIAMGHP          | 144 | ACI GGGQG    |
| Lep_PxylT1-9            | 85  | KPVLGVNRLCGSG     | 313 | DVDLIEINEAFCA     | 342 | NVNGGATALGHP          | 381 | ACI GGGMG    |
| Lep_PxylT1-10           | 43  | HPR - - - - - ES  | 144 | DVDLIEINEAFCA     | 173 | NVNGGATALGHP          | 202 | - - - - -    |
| Pht_PhumT1              | 6   | - - - - -         | 207 | DI DLVEINEAFSA    | 236 | NVNGGAVALGHP          | 275 | ACI GGGQG    |
| HsapT1                  | 83  | TPALTI NRLCGSG    | 313 | DM DLVEINEAFAP    | 342 | NVNGGAIALGHP          | 381 | ACI GGGQG    |
| Lep_BmorT2              | 66  | TICTTVNKVCASG     | 295 | DVALWEINEAFSV     | 324 | NVHGGAVSLGHP          | 361 | ICN GGG - G  |
| Hym_AmeIT2              | 66  | TICTTVNKVCASG     | 292 | DIALWEINEAFSV     | 321 | NIHGGAVSLGHP          | 358 | ICN GGG - G  |
| Col_AglaT2-2            | 100 | TICTTVNKVCASG     | 330 | EVALWEINEAFSV     | 359 | NVHGGAVSLGHP          | 396 | ICN GGG - G  |
| Col_AglaT2-1            | 89  | TICTTVNKVCASG     | 319 | EVALWEINEAFSV     | 348 | NVHGGAVSLGHP          | 385 | ICN GGG - G  |
| Dip_DmeIT2              | 100 | VCCTTVNKVCSSG     | 329 | DVAMWEINEAFSL     | 358 | NVHGGAVSLGHP          | 395 | ICN GGG - G  |
| Dip_AgamT2              | 87  | TICTTVNKVCSSG     | 317 | DVAMWEINEAFSL     | 346 | NVHGGAVSLGHP          | 383 | ICN GGG - G  |
| Col_NvesT2-1            | 102 | TICTTVNKVCASG     | 332 | DVAMWEINEAFSV     | 361 | NIHGGAVSLGHP          | 398 | ICN GGG - G  |
| Col_NvesT2-2            | 102 | TICTTVNKVCASG     | 332 | DVAMWEINEAFSV     | 361 | NIHGGAVSLGHP          | 398 | ICN GGG - G  |
| Col_TcasT2              | 101 | TICTTVNKVCASG     | 331 | DVALWEINEAFSV     | 360 | NVHGGAVSLGHP          | 397 | ICN GGG - G  |
| Dip_CquiT2              | 99  | TICTTVNKVCSSG     | 329 | DVAMWEINEAFSV     | 358 | NVHGGAVSLGHP          | 395 | ICN GGG - G  |
| Hem_ApisT2              | 103 | TICTTVNKVCASG     | 333 | DIALWEINEAFSV     | 362 | NVHGGAVSLGHP          | 399 | ICN GGG - G  |
| Hem_ClecT2              | 103 | VICTTVNKVCSSG     | 333 | DVALWEINEAFSV     | 362 | NVHGGAVSLGHP          | 399 | ICN GGG - G  |
| Hem_HhalT2              | 101 | VICTTVNKVCASG     | 331 | DVALWEINEAFSV     | 360 | NVHGGAVSLGHP          | 397 | ICN GGG - G  |
| Hym_DallT2-2            | 102 | TICTTVNKVCASG     | 332 | DVALWEINEAFSV     | 361 | NVHGGAVSLGHP          | 398 | ICN GGG - G  |
| Hym_DallT2-1            | 102 | TICTTVNKVCASG     | 332 | DVALWEINEAFSV     | 361 | NVHGGAVSLGHP          | 398 | ICN GGG - G  |
| Hym_DallT2-3            | 102 | TICTTVNKVCASG     | 332 | DVALWEINEAFSV     | 361 | NVHGGAVSLGHP          | 398 | ICN GGG - G  |
| Iso_ZnevT2              | 99  | TICATINNKVCASG    | 329 | DISLWEINEAFSV     | 358 | NVHGGAVSLGHP          | 395 | ICN GGG - G  |
| Hym_BimpT2-2            | 102 | TICTTVNKVCASG     | 332 | DIALWEINEAFSV     | 361 | NIHGGAVSLGHP          | 398 | ICN GGG - G  |
| Hym_BimpT2-1            | 102 | TICTTVNKVCASG     | 332 | DIALWEINEAFSV     | 361 | NIHGGAVSLGHP          | 398 | ICN GGG - G  |
| Lep_DpleT2              | 112 | TICTTVNKVCSSG     | 342 | DIALWEINEAFSV     | 371 | NVHGGGVS LGHP         | 408 | ICN GGG - G  |
| Lep_HmelT2              | 110 | TICTTVNKVCASG     | 340 | DVALWEINEAFSV     | 369 | NVHGGAVSLGHP          | 406 | ICN GGG - G  |
| Lep_MsexT2              | 66  | TICTTVNKVCASG     | 296 | DVALWEINEAFSV     | 325 | NVHGGAVSLGHP          | 362 | ICN GGG - G  |
| Lep_PxutT2-1            | 111 | TICTTVNKVCASG     | 341 | DVALWEINEAFSV     | 370 | NVHGGAVSLGHP          | 407 | ICN GGG - G  |
| Lep_PxutT2-2            | 88  | TICTTVNKVCASG     | 318 | DVALWEINEAFSV     | 347 | NVHGGAVSLGHP          | 384 | ICN GGG - G  |
| Lep_PxylT2              | 111 | TICTTVNKVCSSG     | 341 | EVALWEINEAFSV     | 370 | NVHGGAVSLGHP          | 407 | ICN GGG - G  |
| Pht_PhumT2-2            | 102 | TVCTTVNKVCSSG     | 330 | QIAQWEINEAFSV     | 359 | NKHGGAVSLGHP          | 396 | ICN GGG - G  |
| Pht_PhumT2-1            | 19  | VIASSIN KLCGSG    | 247 | DIHLWEI HETFSL    | 276 | NIHGGGVS MGHP         | 289 | - - - - - G  |
| HsapT2                  | 117 | TPCTTVNKVCASG     | 346 | DIAMWEINEAFSL     | 375 | NINGGAVSLGHP          | 412 | ICN GGG - G  |
| MtubT2                  | 75  | VPALTI NKMCLSG    | 306 | QLDVVEINEAFAA     | 335 | NVNGGAIALV GHP        | 374 | LC - GGGQG   |
| Hym_AmeICT              | 81  | TPAYLINMLCGSG     | 313 | EVDLFEINEAFAA     | 342 | NINGGAIALGHP          | 381 | LCI GGGMG    |
| Dip_AgamCT              | 78  | VPAYLINMLCGSG     | 307 | EVDLFEINEAFAA     | 336 | NVGGGAIALGHP          | 375 | LCV GGGMG    |
| Dip_DmeICT              | 79  | VPAYGINMLCGSG     | 308 | EVDLYELNEAFAA     | 337 | NVNGGAIALGHP          | 376 | LCI GGGMG    |
| Col_NvesCT              | 80  | VPATTLNMLCGSG     | 305 | DVELYEINEAFAS     | 334 | NVNGGAIALGHP          | 373 | LCI GGGMG    |
| Col_TcasCT              | 80  | VPAYTINMLCGSG     | 306 | DVDLYELNEAFAV     | 335 | NITGGAIALGHP          | 374 | LCI GGGMG    |
| Dip_CquiCT-1            | 82  | APAYLINLLCGSG     | 311 | EVDLFEINEAFAA     | 340 | NVGGGAIALGHP          | 379 | LCV GGGMG    |
| Dip_CquiCT-2            | 77  | - PA - DVDEIL - G | 303 | EVDLFEINEAFAA     | 332 | NVGGGAIALGHP          | 371 | LCV GGGMG    |
| Hem_ApisCT-6            | 77  | VPAHGINLLCGSG     | 307 | SVDIFELNEAYAA     | 336 | NINGGAISLGHP          | 375 | LCI GGGMG    |
| Hem_ApisCT-2            | 80  | VPAHVINMLCGSG     | 310 | SVDIFELNEAFAA     | 339 | NIYGGAIALGHP          | 378 | LCV GGGMG    |
| Hem_ApisCT-5            | 80  | VPAHGINLLCGSG     | 310 | SVDIFELNEAYAA     | 339 | NINGGAISLGHP          | 378 | LCI GGGMG    |
| Hem_ApisCT-4            | 98  | VPAHGINLLCGSG     | 329 | SVDIFELNEAYAA     | 357 | NVNGGAIALGHP          | 396 | LCI GGGMG    |
| Hem_ApisCT-3            | 80  | VPAHVINMLCGSG     | 310 | SVDIFELNEAFAA     | 339 | NINGGAIALGHP          | 378 | LCV GGGMG    |
| Hem_ApisCT-7            | 23  | - - - - -         | 186 | DI DLVEMTEAFSA    | 215 | NIYGGAIALGHP          | 254 | ACI GGGLG    |
| Hem_ApisCT-1            | 61  | - - - - - CTPL    | 184 | EADTLDLNEAV - -   | 196 | - - - - - SF - -      | 206 | - - - - -    |
| Hem_ClecCT-1            | 80  | VP AFTVNQLCGSG    | 309 | DVDLFEINEAFAA     | 338 | NVSGGAIALGHP          | 377 | LCI GGGMG    |
| Hem_ClecCT-2            | 79  | TPAMTINEVCGSG     | 299 | DI DVIEIEMTEAFAS  | 328 | NLYGGAIALGHP          | 367 | ACI GGGLG    |
| Hem_HhalCT              | 81  | VPAYTINMLCGSG     | 310 | DVDLFEINEAFSA     | 339 | NINGGAISLGHP          | 378 | LCI GGGMG    |
| Hym_BimpCT              | 81  | VPAYTINMLCGSG     | 311 | EVDLFEINEAFAA     | 340 | NINGGAIALGHP          | 379 | LCI GGGMG    |
| Hym_DallCT-2            | 81  | VPAYVINMICGSG     | 311 | EVDLYELNEAFAS     | 340 | NVNGGAIALGHP          | 379 | LCI GGGMG    |
| Hym_DallCT-1            | 28  | TPAFTVSKVCGSG     | 258 | DI DLIEANEAFAA    | 287 | NVNGGAIALGHP          | 326 | LCI GGGQG    |
| Iso_ZnevCT              | 81  | VPAYLVNMLCGSG     | 311 | DVDLFEINEAFAA     | 340 | NICGGAIALGHP          | 379 | LCV GGGMG    |
| Lep_PxylCT              | 79  | VSAITINDVCGSG     | 290 | DVDLFEINEAFAA     | 319 | NVNGGAIALGHP          | 358 | LCI GGGMG    |
| Pht_PhumCT              | 81  | VP AFTVNMLCGSG    | 311 | EVDLFEINEAFAA     | 340 | NVNGGAIALGHP          | 379 | LCI GGGME    |
| HsapCT                  | 83  | VP AWSCQMICGSG    | 314 | DVDIFEINEAFAA     | 343 | NI EGGAIALGHP         | 382 | LCI GGGMG    |
| Lep_PxutAB-1            | 87  | IPVSTVNRQCASG     | 301 | DVSYFEINEAFSP     | 330 | NVYGGSIALGHP          | 371 | LCV GG - FG  |
| Lep_PxutAB-2            | 87  | IPVSTVNRQCASG     | 301 | DVSYFEINEAFSP     | 330 | NVYGGSIALGHP          | 371 | LCV GG - FG  |
| HsapAB                  | 114 | VPLSTVNRQCSSG     | 338 | DVDIFEINEAFAS     | 367 | NPLGGGVALGHP          | 408 | MC IGG - MG  |
| Lep_BmorTFE             | 141 | TPAHTVTMACISS     | 385 | DI DTWEIHEAFAG    | 431 | NKWGGSLSIGHP          | 470 | ACAAGGGQG    |
| Hym_AmeITFE             | 117 | IPAHTVTMACISS     | 361 | DI GVWEIHEAFAG    | 407 | NAWGGSLSIGHP          | 446 | ACAAGGGQG    |
| Dip_DmeITFE             | 119 | TPAHTVTMACISS     | 363 | DI DSWEIHEAFAG    | 409 | NNWGGSLSIGHP          | 448 | ACAAGGGQG    |
| Dip_AgamTFE-2           | 27  | VGAVTVNRLCGSS     | 246 | DI DLFEINEAFAA    | 278 | NLNGGAIALGHP          | 423 | ACVGGGGQG    |
| Dip_AgamTFE-1           | 81  | TPAHTVTMACISS     | 325 | DI DTWEIHEAFAG    | 371 | NNWGGSLSIGHP          | 410 | ACAAGGGQG    |
| Col_NvesTFE             | 122 | IPAHTVTMACISS     | 366 | DI DWEFHEAFAG     | 412 | NNWGGSLSIGHP          | 451 | ACAAGGGQG    |
| Col_TcasTFE             | 124 | TPAHTVTMACISS     | 368 | DI AVWEFHEAFAG    | 414 | NNWGGSLSIGHP          | 453 | ACAAGGGQG    |
| Dip_CquiTFE             | 117 | TPAHTVTMACISS     | 361 | DI DSWEIHEAFAG    | 407 | NNWGGSLSIGHP          | 446 | ACAAGGGQG    |
| Hem_ApisTFE             | 119 | VP AHTVTMACISS    | 363 | DI DVWEVHEAFAG    | 409 | NKWGGSLSIGHP          | 448 | ACAAGGGQG    |
| Hem_ClecTFE-2           | 117 | TPAHTVTMACISS     | 382 | DI DAWEFHEAFAG    | 428 | NNWGGSLSIGHP          | 467 | ACAAGGGQG    |
| Hem_ClecTFE-1           | 117 | TPAHTVTMACISS     | 361 | DI DAWEFHEAFAG    | 407 | NNWGGSLSIGHP          | 446 | ACAAGGGQG    |
| Hem_HhalTFE             | 120 | TPAHTVTMACISS     | 364 | DI DVWEFHEAFAG    | 410 | NNW                   |     |              |
